# Supplementary material for: Navigating Workplace Stress: A Qualitative Exploration of Mental Healthcare Workers’ Lived Experiences with STAPP@Work, a Mobile Stress Management Intervention
Source: Research Square preprint supplement (doi:10.21203/rs.3.rs-6611387/v1), 2025-07-10
Supplement: Supplementary file 1 [file 075b8c5c227b0494df4143e3.docx]

**Interview guide**

Thank you for taking the time and effort to meet with me today. In this interview, I am going to ask you a few questions about your experience of using STAPP@Work. I would love to hear your experiences so we can better understand how mental health workers think about this app. There are no right or wrong answers. Our goal is primarily to understand and create a narrative around the use of such an app in everyday life, especially at work. I am curious about your experiences, opinions and thoughts.

In the consent form, you have indicated that you have agreed/disagreed to have this interview recorded on audio material. For that reason, I will start the recording soon when we start the interview/taking notes during the interview. Do you agree?

Before we begin, do you have any questions about the interview?

Perhaps we can begin by briefly introducing ourselves so that we have a better idea of one another. I can start by telling you some things about me and introducing myself….

| **Section** | **Main questions** | **Follow-up questions** |
| --- | --- | --- |
| **Introduction** | ... I would also like to know more about you, could you introduce yourself? | - Demographic variables (Age, sex, job role) |
|  | How does a typical work week look like for you? | - Work tasks/responsibilities? - Number of working days/hours per week - How do you find that? - Can you zoom in on a working day? How does that look like for you? |
|  | What do you consider important in your work life? | - Why do you think so? |
| **General use of the app** | *A little while ago, we asked you to use the STAPP@Work app for 2 weeks....* | |
| Usability | How did that go? | - Why do you think it was like that? - When you said [...], what do you mean by this? |
| Usability | What did you think of using the app? | - When you said [...], what do you mean by this? - What was the reason for that, in your opinion? - You said [...], could you explain that more? |
| Usability | What was it like to use the app during your work week/workday?    Were there any times when you didn't want to use the app?    Were there any times when you wanted to use the app more? | - Why was it like that for you, do you think? - When you said [...], what do you mean by that? - What was the reason for that, do you think? - How did that make you feel? - Why do you think that was the case at that moment? |
| **Stress detection** | What did you think about filling out the questionnaire with stress questions in the app? | - Why was it like that for you, do you think? - When you said [...], what did you mean by that? - What was the reason for that, do you think? - How did it make you feel? |
| **Stress detection** | What did you think of seeing the calculated stress level? | - Why did you think that? - Did you do something with it?   - Could you explain that further?   - If yes, what did you think about that? - Can you tell me how you continued your workdays after seeing this?   - And what about your work tasks? - How did you feel about that? |
| **Stress detection/ Coping with stress** | What did you think of the visual overview?  How did you feel about getting feedback about your stress levels on certain moments and with the activities you did? | - What were your thoughts on this? - What did this do to you? - Can you tell me how you continued your workdays after seeing this?   - And what about your work tasks? - How did you notice that? - How did you feel about that? |
| **Coping with stress** | How did you feel about the app providing personal stress-reducing tips? | - Why? - How come it was like that? - And how did you feel about that? - What would you do yourself? - How could we do that differently? - What can be done to address that? |
|  | Looking back, what are your thoughts when you compare a work week of using a STAPP@Work to a week without it? | - Could you explain that more? - Why is that do you think? - You said [...] could you give an example? |
| **Improvements** | Do you have any feedback on the app? If yes, could you share?  If there is anything you would change about the app, what would that be?    And what would you not change? | - Why change or not change? - Why do you think that is? - You said [...], could you give me an example? - How could we do/address this? |
| **Motivation of app use** | What do you think would be reasons for mental health workers to use the app?    What do you think would be reasons for mental health workers not to use the app? | - Why do you think that is? |
| **Ending** | We are nearing the end of the interview, is there anything you would like to add or say? |  |
| **Thank word** | Thanking participant.  Inform participant that a summary of the interview will be sent shortly after the interview for member checking. |  |
